# Supplementary material
Source: PubMed Central journal article supplement (PMC7568276)
Supplement: pnas.1912772117.sapp.pdf [file pnas.1912772117.sapp.pdf]

# Supplementary Information for

**Driver mutations of the adenoma-carcinoma sequence govern the intestinal epithelial global translational capacity.**

WL Smit, CN Spaan, RJ de Boer, P Ramesh, T Martins Garcia, BJ Meijer, JLM Vermeulen, M Lezzerini, AW MacInnes, J Koster, JP Medema, GR van den Brink, V Muncan, J Heijmans.

Corresponding Author:

Jarom Heijmans: [j.heijmans@amsterdamumc.nl](mailto:j.heijmans@amsterdamumc.nl)

**This PDF file includes:**

Figs. S1 to S3

Table S1

Movies S1 and S2

A

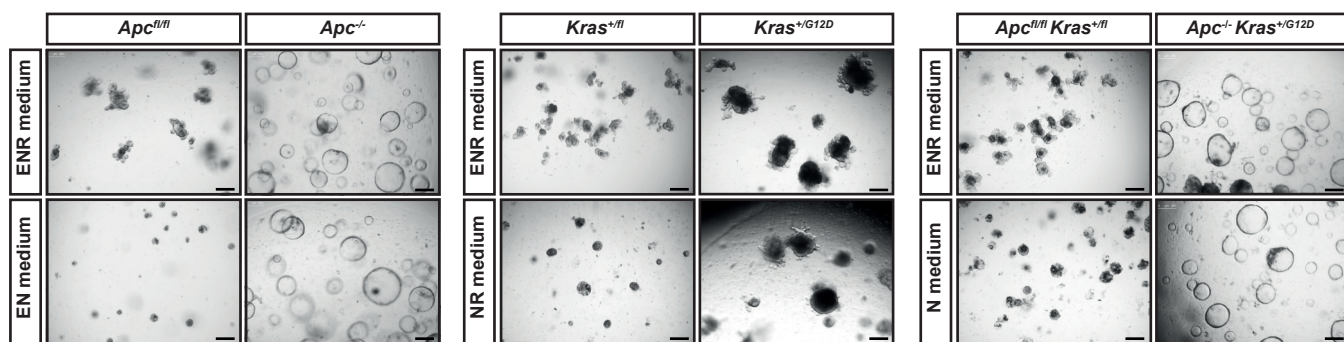

B

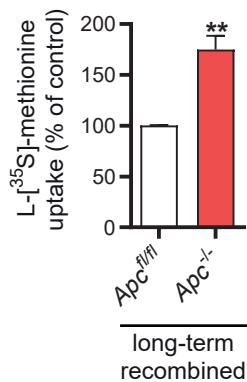

C

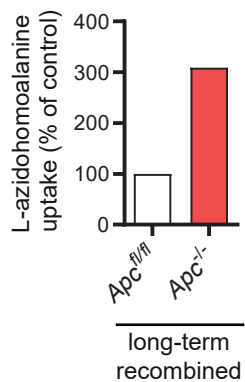

D

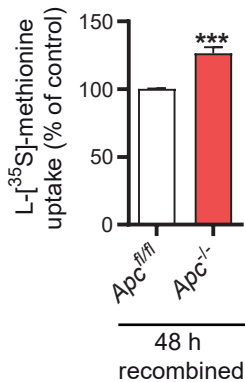

E

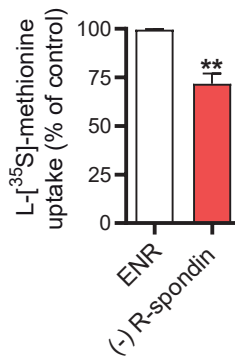

F

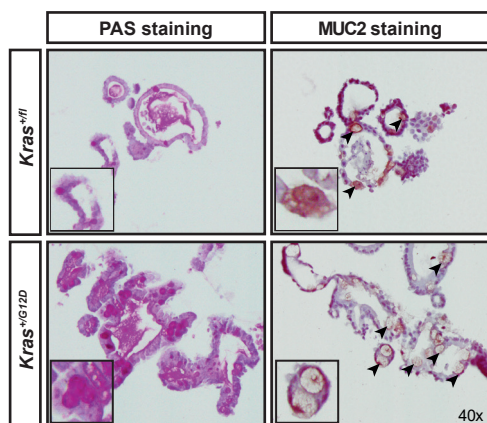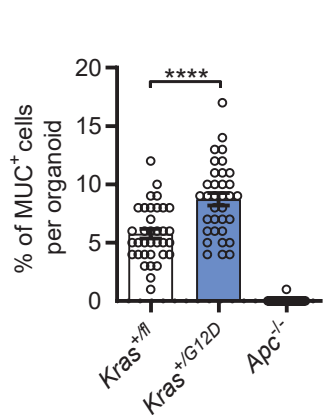

G

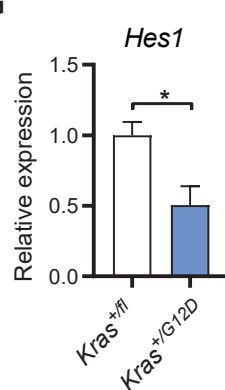

H

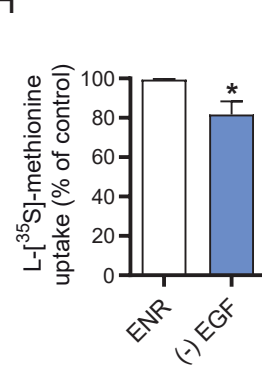

I

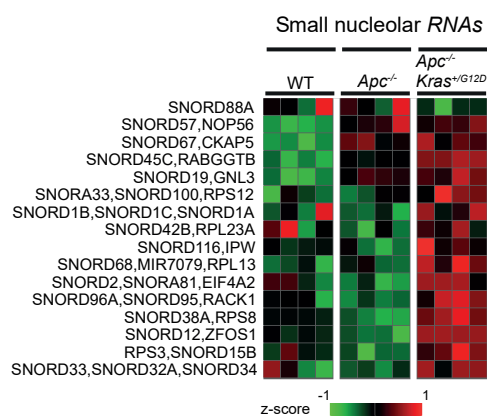

J

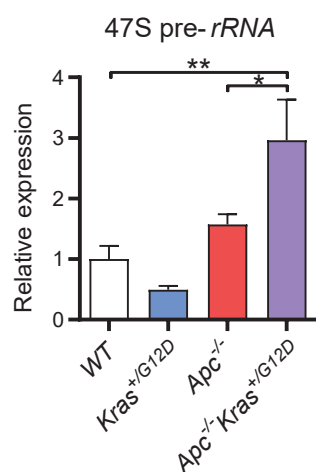

K

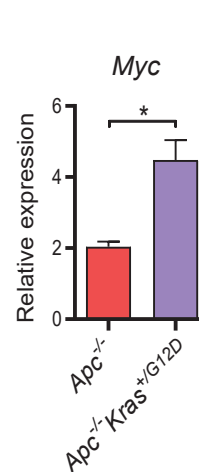

L

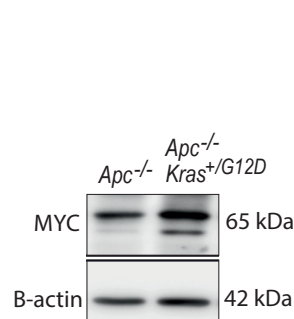

M

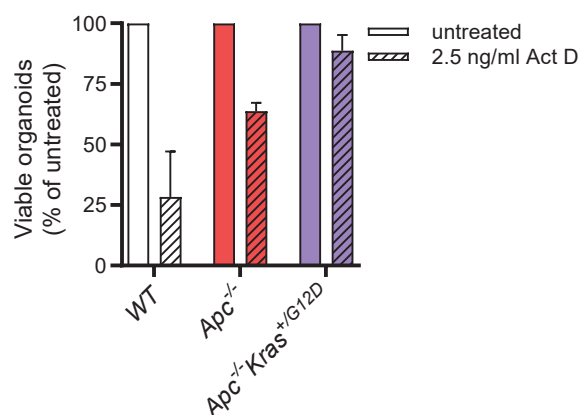

N

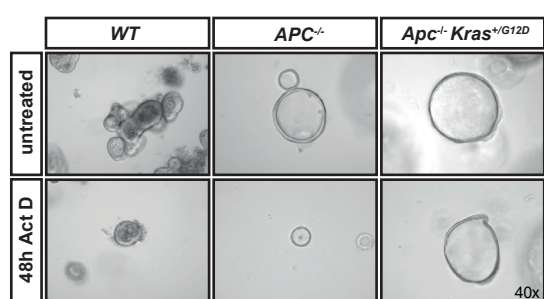

**Fig. S1.**

(A) Representative images of *Apc*<sup>-/-</sup> (left panel), *Kras*<sup>+/*G12D*</sup> (middle panel), and *Apc*<sup>-/*Kras*<sup>+/*G12D*</sup> organoids (right panel) 3 days after passaging. Each panel also shows the method of selection for mutant cells using culture factor withdrawal; E = EGF, N = Noggin, R = R-spondin, scale bar = 250 μm (B) L-[<sup>35</sup>S]-Methionine incorporation assay in *Apc*<sup>-/-</sup> organoids recombined for several weeks (>2 weeks) assessed at day 4 after passaging (*n* = 2) (C) Flow cytometric quantification of L-azidohomoalanine incorporation represented as relative fluorescence intensity compared to non-recombined controls assessed at day 4 after passaging. (D) L-[<sup>35</sup>S]-Methionine incorporation assay in *Apc*<sup>-/-</sup> organoids 48 h after recombination, assessed at day 4 after passaging (*n* = 4). (E) L-[<sup>35</sup>S]-Methionine incorporation assay in wildtype organoids cultured for 3 days in ENR followed by 24 hour withdrawal of R-spondin (*n* = 3). (F) Example of PAS and MUC2 staining in *Kras*<sup>+/*G12D*</sup> organoids and quantification of MUC2-positive cells, indicated by black arrows (40x objective). Data presented as number of MUC2-positive cells relative to the number of cells per organoid. (G) Quantitative RT-PCR analysis of Notch target gene *Hes1* in *Kras*<sup>+/*G12D*</sup> organoids (*n* = 3). (H) L-[<sup>35</sup>S]-Methionine incorporation assay in wildtype organoids cultured for 3 days in ENR followed by 24 hour withdrawal of EGF (*n* = 3). (I) Heatmap of microarray *mRNA* expression data containing a set of genes encoding for small nucleolar *RNAs* in wildtype, *Apc*<sup>-/-</sup> and *Apc*<sup>-/*Kras*<sup>+/*G12D*</sup> organoids (*n* = 4). (J) Quantitative RT-PCR analysis of the 5' external transcribed spacer of 47S pre-*rRNA* as a proxy measurement of *rRNA* synthesis (*n* = 3). (K) Quantitative RT-PCR analysis of *Myc* in *Apc*<sup>-/-</sup> and *Apc*<sup>-/*Kras*<sup>+/*G12D*</sup> organoids (*n* = 3). (L) Representative immunoblot of MYC levels in *Apc*<sup>-/-</sup> and *Apc*<sup>-/*Kras*<sup>+/*G12D*</sup> organoids (*n* = 2). (M) Quantification of the number of viable</sup></sup></sup></sup>

organoids treated for 72 h with 2.5 ng/ml Actinomycin D and presented as relative growth reduction to their respective untreated control ( $n = 2$ ). (N) Representative microscopic image of organoids treated with 2.5 ng/ml Actinomycin D.

Significance in all figures analyzed by Student *t*-test, \*P < 0.05, \*\*P < 0.01, \*\*\*P < 0.001.

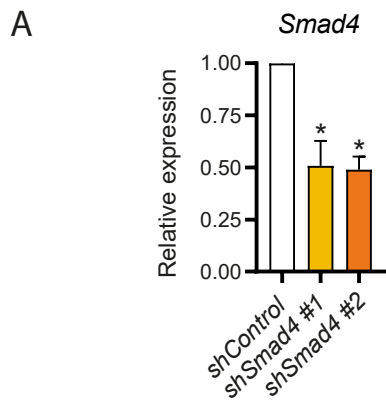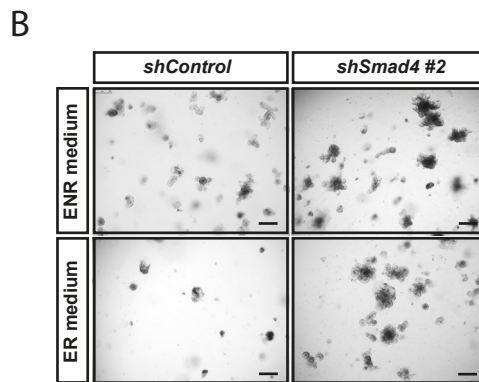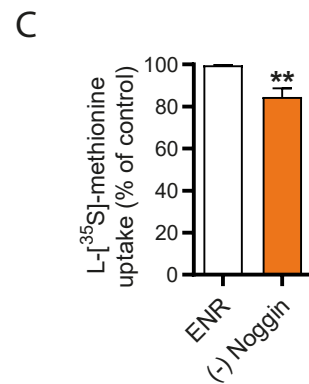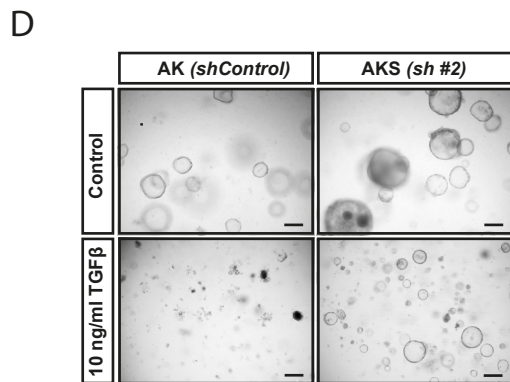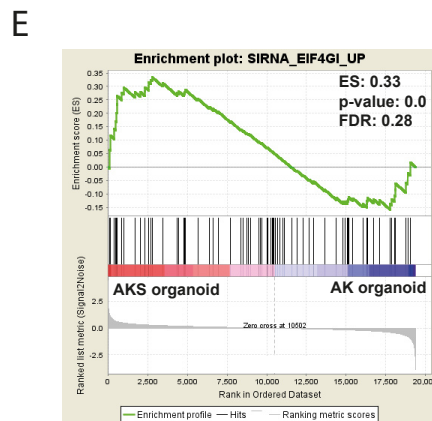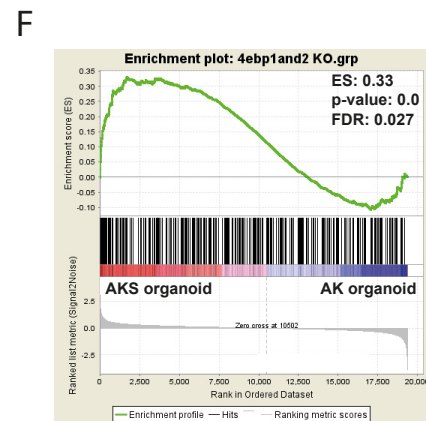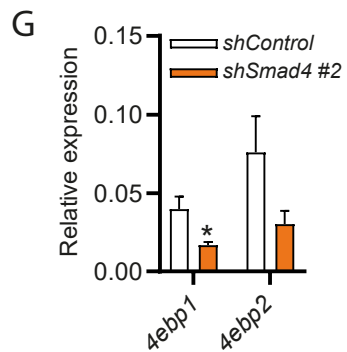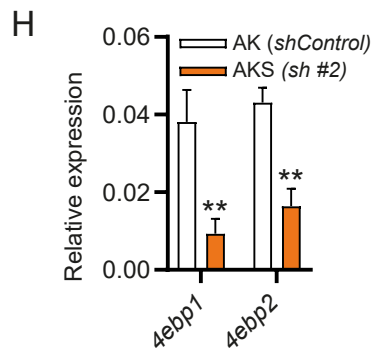

**Fig. S2.**

(A) Quantitative RT-PCR analysis of *Smad4* in wildtype organoids transduced with two *shRNAs* against *Smad4* and scrambled control *shRNAs* ( $n = 3$ ). (B) Representative image of generated *shSmad4* organoids 3 days after passaging and the method of selection using long-term Noggin withdrawal; E = EGF, N = Noggin, R = R-spondin, scale bar = 250  $\mu\text{m}$ . (C) L-[ $^{35}\text{S}$ ]-Methionine incorporation assay in wildtype organoids cultured for 3 days in ENR followed by 24 h withdrawal of Noggin ( $n = 3$ ). Student *t*-test, \* $P < 0.05$ . (D) Representative image of generated *Apc*<sup>-/-</sup>*Kras*<sup>+G12D</sup> *shSmad4* #2 (AKS) organoids and the method of selection showing the regenerative potential under incubation with 10 ng/ml human recombinant TGF $\beta$ . Scale bar = 250  $\mu\text{m}$ . (E) Gene set enrichment plot comparing AK and AKS organoids against a published gene set of a MCF10A cell line with high EIF4G1 expression. (F) Gene set enrichment plot comparing AK and AKS organoids against a published gene set of *4ebp1/4ebp2* double KO mouse fibroblasts. (G) Quantitative RT-PCR analysis of *4ebp1* and *4ebp2* expression in *shControl* and *shSmad4* organoids. (H) Quantitative RT-PCR analysis of *4ebp1* and *4ebp2* expression in AK and AKS organoids ( $n = 3$ ).

Significance in all figures analyzed by One-way ANOVA, \* $P < 0.05$ , \*\* $P < 0.01$ .

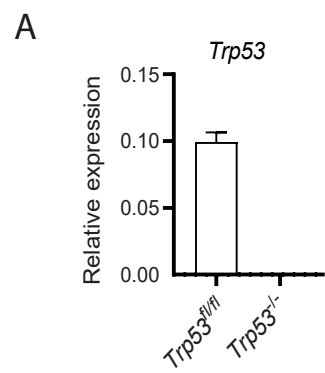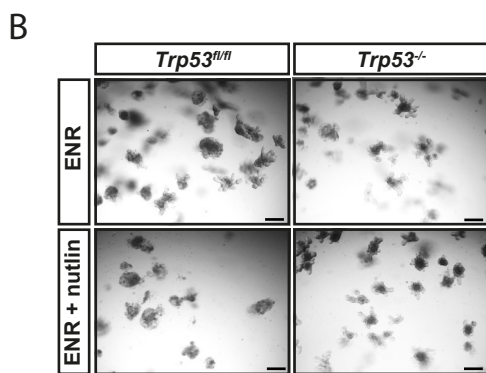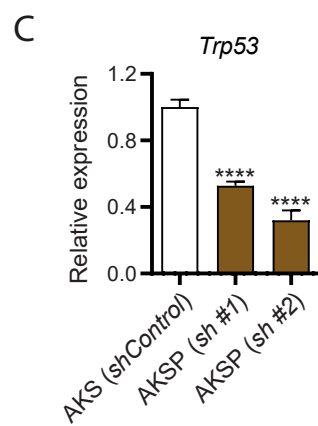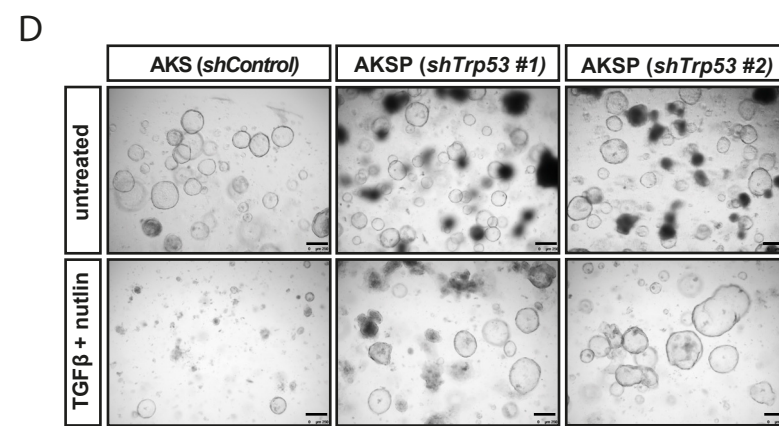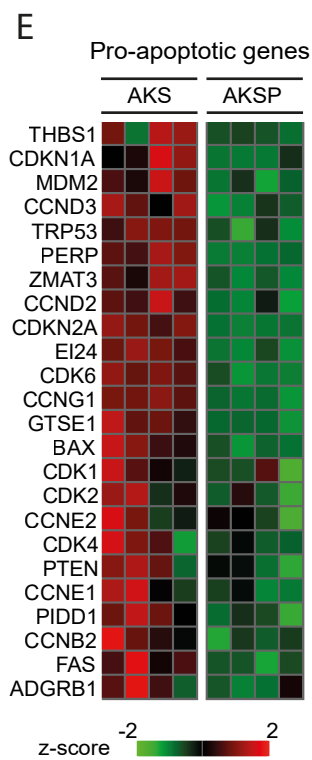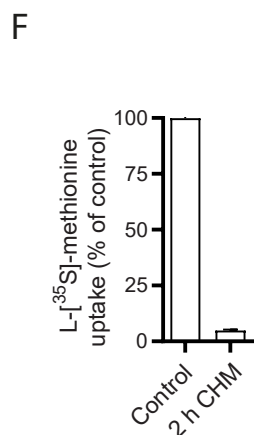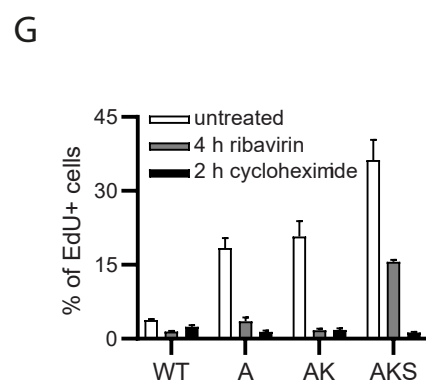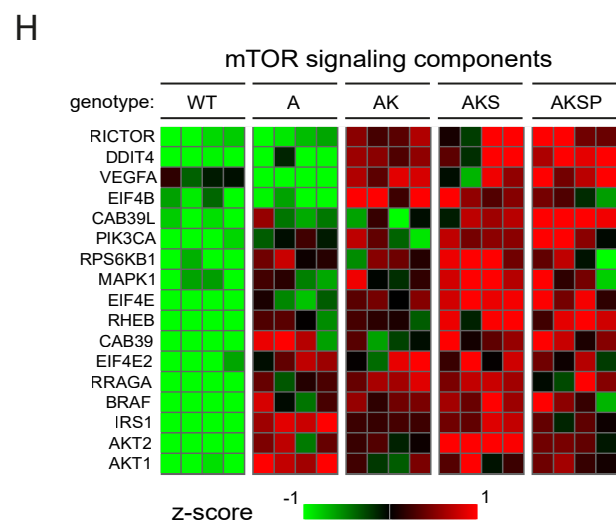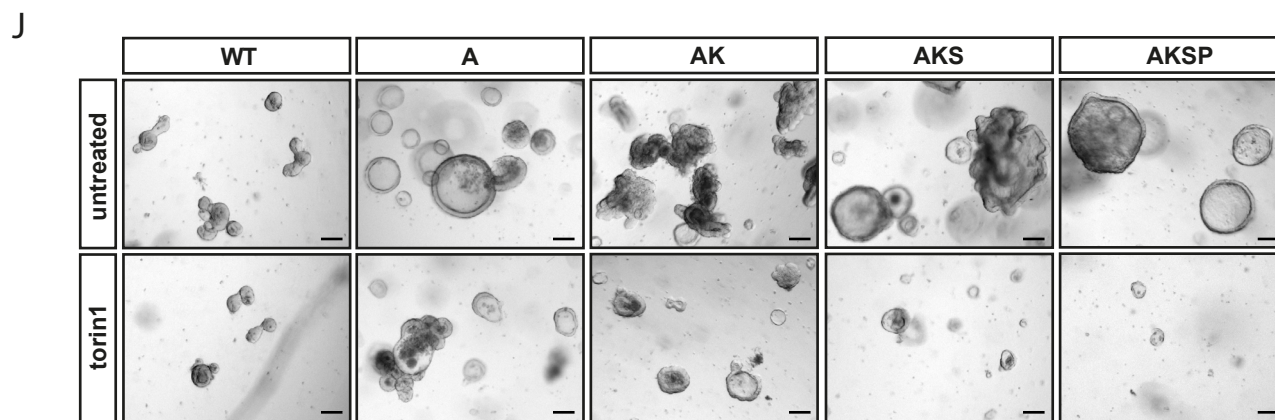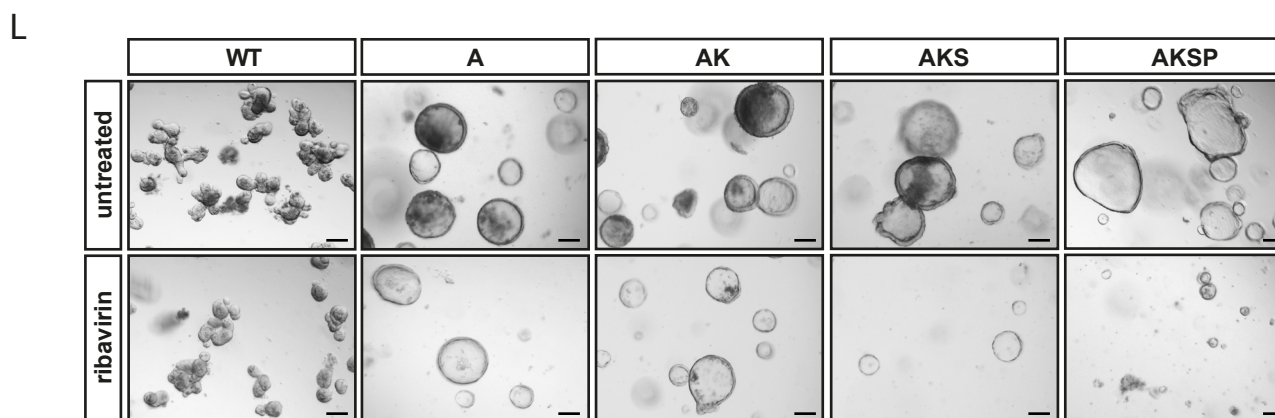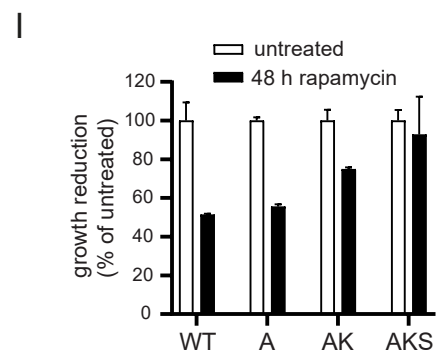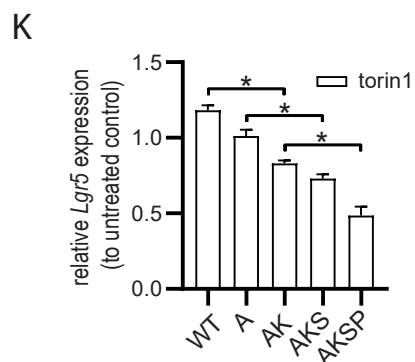

**Fig. S3.**

(A) Quantitative RT-PCR analysis of *Trp53* mRNA expression MSCV-Cre *Trp53*<sup>-/-</sup> organoids 48 h after recombination (*n* = 2). (B) Representative image of *Trp53*<sup>-/-</sup> organoids 3 days after passaging, and the method of selection using 5 day incubation with 10 μM Nutlin-3. Scale bar = 250 μm. (C) Quantitative RT-PCR analysis of *Trp53* in AKS organoids transduced with two different *shRNAs* against *Trp53* (*n* = 3). (D) Representative image of generated AKSP organoids 3 days after passaging, and the method of selection for *Smad4* and *Trp53* knockdown showing the regenerative potential during incubation with a combination of 10 ng/ml recombinant TGFβ and 10 μM Nutlin-3. Scale bar = 250 μm. (E) Heatmap of microarray mRNA expression data containing a set of pro-apoptotic genes in AKSP and AKS organoids (*n* = 4). (F) L-[<sup>35</sup>S]-Methionine incorporation assay in wildtype organoids treated for 2 h treatment in the presence of 10 μg/ml cycloheximide (CHM). (G) EdU incorporation assay in organoids treated for 2 h with 10 μg/ml cycloheximide or 4 h with 1 mM ribavirin. Data presented as percentage of the number of EdU-positive cells to the total cell population (*n* = 2). (H) Heatmap of microarray mRNA expression data containing genes related to mTORC1 and mTORC1 signaling in organoids of all ACS genotypes (*n* = 4). (I) Representative experiment of growth in organoids with ACS mutations treated for 48 h with 100 nM rapamycin and presented as quantified growth reduction after treatment relative to untreated control (*n* = 2). (J) Representative images of organoids with ACS mutations treated for 48 h with 50 nM torin 1. (K) Quantitative RT-qPCR analysis of stem cell marker *Lgr5* in organoids with ACS mutations treated for 48 h with 50 nM Torin 1 (*n* = 2). (L) Representative images of organoids with ACS mutations treated for 48 h with 10 μM ribavirin.



Significance in all figures analyzed by One-way ANOVA, \*P < 0.05, \*\*P < 0.01, \*\*\*P < 0.001.

**Table 1. List of used RT-qPCR primers**

| Gene               | Forward primer         | Reverse primer          |
|--------------------|------------------------|-------------------------|
| Lgr5               | TGTGTCAAAGCATTTCCAGC   | CAGCGTCTTCACCTCCTACC    |
| Lyz1               | ATGGAATGGCTGGCTACTATGG | ACCAGTATCGGCTATTGATCTGA |
| Muc2               | GAAGCCAGATCCCGAAACCA   | GAATCGGTAGACATCGCCGT    |
| Chga1              | GTCTCCAGACACTCAGGGCT   | ATGACAAAAGGGGACACCAA    |
| Alpi               | CACAGCTTACCTGGCACTGA   | GGTCTCTGACGACAGGGGTA    |
| Cd44               | TCTGCCATCTAGACTAAGAGC  | GTCTGGGTATTGAAAGGTGTAGC |
| Sox9               | AGGAAGCTGGCAGACCAGTA   | TCCACGAAGGGTCTCTTCTC    |
| Smad4              | GGTGTCTCACCTGGAATTGA   | GGCTGTCCTCAAAGTCGTG     |
| P53                | AAAGGATGCCCATGCTACAG   | CCCCACTTCTTGACCATTG     |
| Hes1               | CCAGCCAGTGCAACACGA     | AATGCCGGGAGCTATCTTTCT   |
| eIf4ebp1           | GGGACTACAGCACCCTC      | CTCATCGCTGGTAGGGCTA     |
| ETS (47S pre-rRNA) | TTTTGGGGAGGTGGAGAGTC   | AGAGAACTCCGGAGCACCAC    |

**Movie S1.**

Cross sectional view of a wildtype small intestinal organoid transduced with scrambled control *shRNA*, three days after passaging. Visible is the central lumen containing cellular debris and normal buds consisting of stem cells and Paneth cells (cells with dark grey vesicles in the crypt bottom).

**Movie S2.**

Cross sectional view of a small intestinal organoid transduced with *shRNA* against *Smad4*, three days after passaging. Knockdown of *Smad4* results in extensive formation of buds compared to wildtype organoids (movie S1), indicating enrichment for both stem cell and Paneth cell populations.
